# Supplementary material for: Subcritical CO2–H2O hydrolysis of polyethylene terephthalate as a sustainable chemical recycling platform
Source: Royal Society of Chemistry journal article supplement (doi:10.1039/d3gc04576e), 2024-01-01
Supplement: d3gc04576e1.pdf [file d3gc04576e1.pdf]

## Electronic Supporting Information

### **Subcritical CO<sub>2</sub>-H<sub>2</sub>O Hydrolysis of Polyethylene Terephthalate as a Sustainable Chemical Recycling Platform**

Dacosta Osei,<sup>a,b,c</sup> Lakshmiprasad Gurralla,<sup>a,b</sup> Aria Sheldon,<sup>a,b</sup> Jackson Mayuga,<sup>a,b</sup> Clarissa Lincoln,<sup>d,e</sup> Nicholas A. Rorrer<sup>d,e</sup> and Ana Rita C. Morais<sup>a,b\*</sup>

<sup>a</sup> Department of Chemical and Petroleum Engineering, University of Kansas, Lawrence, Kansas 66045, USA

<sup>b</sup> Wonderful Institute for Sustainable Engineering, Lawrence, Kansas, 66045, USA

<sup>c</sup> Center for Environmentally Beneficial Catalysis, University of Kansas, Lawrence, Kansas 66047, USA

<sup>d</sup> Renewable Resources and Enabling Sciences Center, National Renewable Energy Laboratory, Golden, CO, 80401 USA

<sup>e</sup> BOTTLE Consortium, Golden, CO 80401 USA

\*Corresponding author: [ana.morais@ku.edu](mailto:ana.morais@ku.edu)

**Table S1.** Effect of CO<sub>2</sub> addition (versus N<sub>2</sub>) and CO<sub>2</sub> pressure on the hydrolysis of PET.

| Reaction conditions |         |                 |                        |                      | Product yield (%) |          |         |
|---------------------|---------|-----------------|------------------------|----------------------|-------------------|----------|---------|
| T (°C)              | t (min) | Gas             | Initial pressure (psi) | Final pressure (psi) | TPA               | MHET     | BHET    |
| 180                 | 100     | CO <sub>2</sub> | 208                    | 385±2                | 39.1±0.7          | 14.3±1.2 | 2.3±0.4 |
| 180                 | 100     | N <sub>2</sub>  | 208                    | 384±1                | 1.9±0.4           | 2.0±0.3  | 1.1±0.2 |
| 180                 | 100     | CO <sub>2</sub> | 108                    | 258±1                | 12.6±1.4          | 7.3±0.8  | 2.3±1.6 |
| 180                 | 100     | CO <sub>2</sub> | 308                    | 539±1                | 59.4±0.8          | 11.4±2.2 | 1.6±0.4 |
| 180                 | 100     | CO <sub>2</sub> | 408                    | 694±2                | 73.6±0.6          | 7.1±0.6  | 0.9±0.1 |

Reaction condition:  
s:  
PET  
to  
H<sub>2</sub>O  
ratio  
1:8

w/w (2.5 g PET: 20 g of H<sub>2</sub>O); <sup>a</sup> Reactions were performed, at least, in duplicate.

**Table S2.** Performance of hot compressed H<sub>2</sub>O (in absence of N<sub>2</sub> and CO<sub>2</sub>) on the hydrolysis of PET at varying temperatures.

| Reaction conditions |         | Product yield (%) <sup>a</sup> |         |         |
|---------------------|---------|--------------------------------|---------|---------|
| T (°C)              | t (min) | TPA                            | MHET    | BHET    |
| 180                 | 100     | 0.5±0.0                        | 0.5±0.5 | 0.2±0.2 |
| 190                 | 100     | 0.1±0.2                        | 0.2±0.2 | 0.1±0.0 |
| 200                 | 100     | 2.4±3.4                        | 2.7±3.4 | 1.4±1.9 |

Reaction conditions: PET to H<sub>2</sub>O ratio 1:8 w/w (2.5 g PET: 20 g of H<sub>2</sub>O); <sup>a</sup> Reactions were performed in duplicate. High product yield variability was obtained due to extremely low concentration of products dissolved in both H<sub>2</sub>O and DMSO.

**Table S3.** Effect of H<sub>2</sub>O and PET loading on the performance of subcritical CO<sub>2</sub>-H<sub>2</sub>O process on PET hydrolysis.

| Reaction conditions                |        |         |                        |                      | TPA yield (%) | PET conversion (%) |
|------------------------------------|--------|---------|------------------------|----------------------|---------------|--------------------|
| PET:H <sub>2</sub> O loading (w/w) | T (°C) | t (min) | Initial pressure (psi) | Final pressure (psi) |               |                    |
| 2.5g PET:20g H <sub>2</sub> O      | 200    | 100     | 208                    | 464                  | 85.0          | 99.0               |
| 3.75g PET:20g H <sub>2</sub> O     | 200    | 100     | 208                    | 479                  | 85.1          | 98.6               |
| 3.75g PET:30g H <sub>2</sub> O     | 200    | 100     | 208                    | 366                  | 7.1           | 37.5               |

PET conversion is given as mass conversion into DMSO-soluble products.

**Table S4.** Effect of varying subcritical CO<sub>2</sub>-H<sub>2</sub>O conditions on the hydrolysis of PET.

| Reaction conditions |        |         |                        |                      | Product yield (%) |          |         | PET conversion (%) |
|---------------------|--------|---------|------------------------|----------------------|-------------------|----------|---------|--------------------|
| $CS_{pCO_2}$        | T (°C) | t (min) | Initial pressure (psi) | Final pressure (psi) | TPA               | MHET     | BHET    |                    |
| -0.65               | 180    | 10      | 208                    | 383±1                | 0.0±0.0           | 0.6±0.7  | 0.5±0.2 | 1.95±2.8           |
| -0.05               | 180    | 40      | 208                    | 383±1                | 5.8±4.3           | 5.0±4.3  | 2.1±2.4 | 28.8±2.0           |
| 0.35                | 180    | 100     | 208                    | 385±2                | 39.1±0.7          | 14.3±1.2 | 2.3±0.4 | 88.2±0.5           |
| -0.41               | 190    | 10      | 208                    | 421±2                | 0.0±0.8           | 1.7±0.8  | 1.5±1.1 | 21.1±1.5           |
| 0.20                | 190    | 40      | 208                    | 420±4                | 30.2±2.3          | 12.0±1.2 | 3.3±0.1 | 95.6±0.8           |
| 0.59                | 190    | 100     | 208                    | 421±3                | 68.3±0.4          | 6.7±3.1  | 0.8±0.6 | 96.6±1.1           |
| -0.16               | 200    | 10      | 208                    | 461±4                | 0.8±0.4           | 4.5±1.0  | 2.8±0.1 | 41.0±2.3           |
| 0.44                | 200    | 40      | 208                    | 465±1                | 59.8±2.7          | 12.1±0.8 | 2.3±1.3 | 97.2±1.8           |
| 0.84                | 200    | 100     | 208                    | 466±0                | 85.0±1.3          | 3.1±1.0  | 0.2±0.0 | 99.0±1.4           |

Reaction conditions: PET to H<sub>2</sub>O ratio 1:8 w/w (2.5 g PET: 20 g of H<sub>2</sub>O); <sup>a</sup> Reactions were performed, at least, in duplicate.  $CS_{pCO_2}$  values of -0.65, -0.41 and -0.16 were not included in Figure 3B in the manuscript because an insignificant production of TPA was observed under these reaction conditions. The effect of all calculated  $CS_{pCO_2}$  values as a function of PET conversion (%) can be found in Figure S8. PET conversion is given as mass conversion into DMSO-soluble products.

**Table S5.** Robustness of subcritical CO<sub>2</sub>-H<sub>2</sub>O to hydrolysis PET: PE mixture and waste PET bottles.

| Substrate                                        | Reaction conditions |         |                        |                      | Product yield (%) |         |         |
|--------------------------------------------------|---------------------|---------|------------------------|----------------------|-------------------|---------|---------|
|                                                  | T (°C)              | t (min) | Initial pressure (psi) | Final pressure (psi) | TPA               | MHET    | BHET    |
| 100 wt% powder PET                               | 200                 | 100     | 208                    | 455±0                | 87.2±2.2          | 3.6±0.7 | 0.6±0.3 |
| 50:50 w/w powder PET:PE                          | 200                 | 100     | 208                    | 461±4                | 83.5±0.3          | 4.2±0.0 | 0.1±0.0 |
| 100 wt% powder colored Canada Dry PET bottle     | 200                 | 100     | 208                    | 457±1                | 86.2±2.2          | 2.9±0.1 | 0.2±0.1 |
| 100 wt% powder colored Mountain Dew PET bottle   | 200                 | 100     | 208                    | 458±2                | 82.5±3.8          | 2.8±0.0 | 0.2±0.1 |
| 100 wt% powder colored Twist up PET bottle       | 200                 | 100     | 208                    | 452±1                | 79.8±2.0          | 3.1±0.4 | 0.2±0.0 |
| 100 wt% powder transparent Pure Life® PET bottle | 200                 | 100     | 208                    | 465±1                | 87.0±1.0          | 4.4±0.0 | 0.4±0.0 |

Reaction conditions: PET to H<sub>2</sub>O ratio 1:8 w/w (2.5 g PET: 20 g of H<sub>2</sub>O); <sup>a</sup> Reactions were performed, at least, in duplicate.

**Table S6.** Crystallinity content, enthalpy of melting ( $\Delta H_m$ ), cold crystallization enthalpy ( $\Delta H_{cc}$ ) of Mountain Dew and Twist Up waste PET soda bottles used in this work.

| <b>Substrate</b>    | <b>Crystallinity (%)</b> | <b><math>\Delta H_m</math> (J/g)</b> | <b><math>\Delta H_{cc}</math> (J/g)</b> |
|---------------------|--------------------------|--------------------------------------|-----------------------------------------|
| Mountain Dew bottle | $19.5 \pm 0.2$           | $27.4 \pm 0.3$                       | 0                                       |
| Twist Up bottle     | $19.7 \pm 0.5$           | $27.6 \pm 0.7$                       | 0                                       |

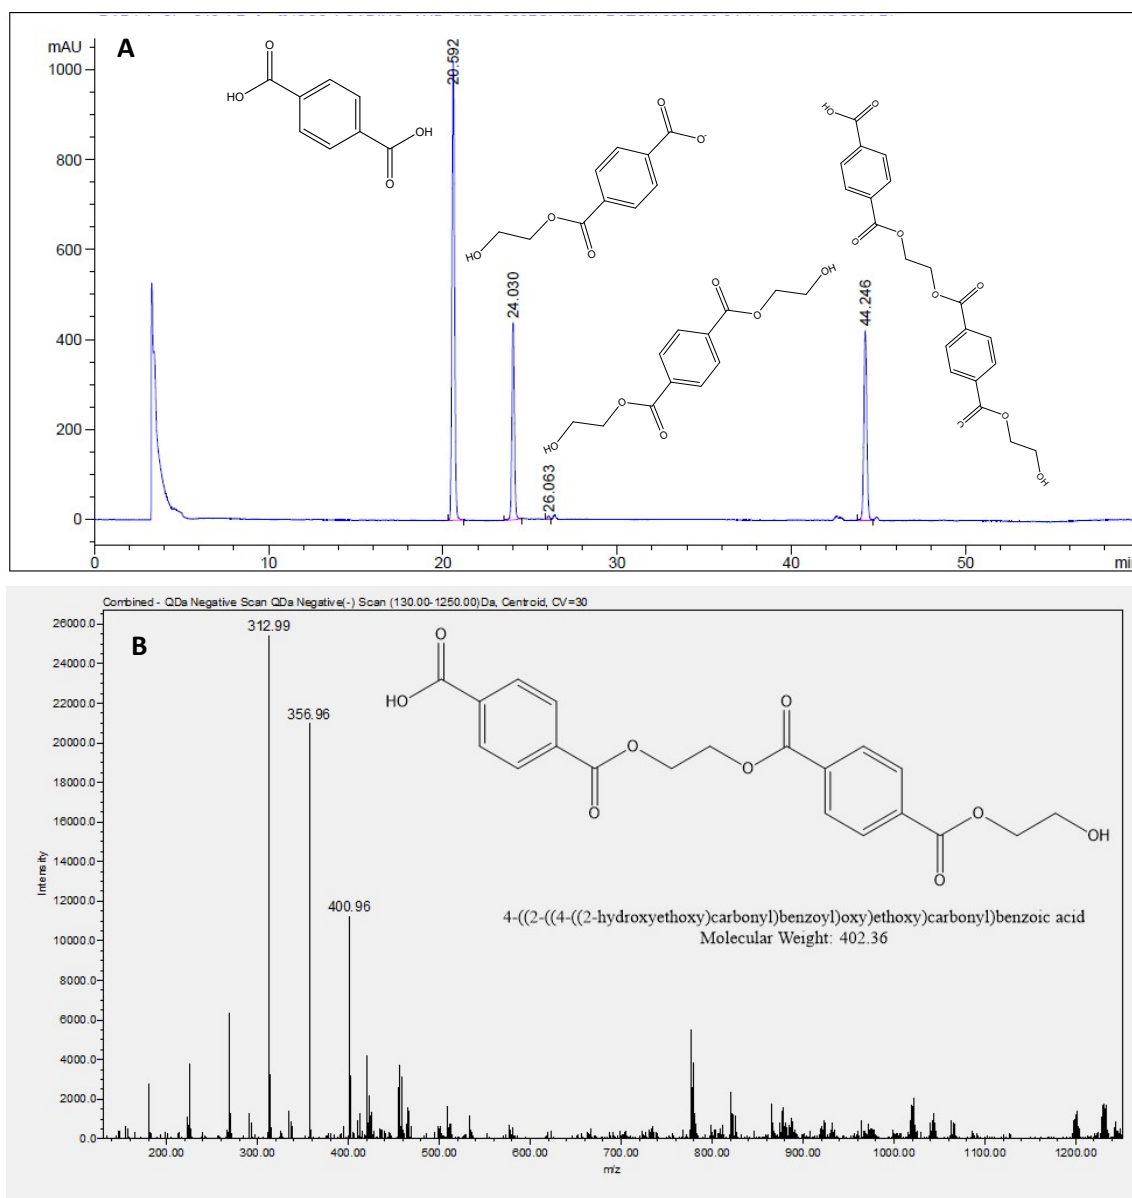

**Figure S1** – A) Chromatogram of the liquid fraction obtained from subcritical CO<sub>2</sub>-H<sub>2</sub>O at 180 °C for 100 min. The compounds at 20.59, 24.03 and 26.06 minutes of retention time were identified using commercially available standards. The compound at 44.25 minutes of retention time was identified through Liquid Chromatography-Mass Spectrometry (LC-MS). B) Ion spectrum of the compound at 44.25 of retention time.



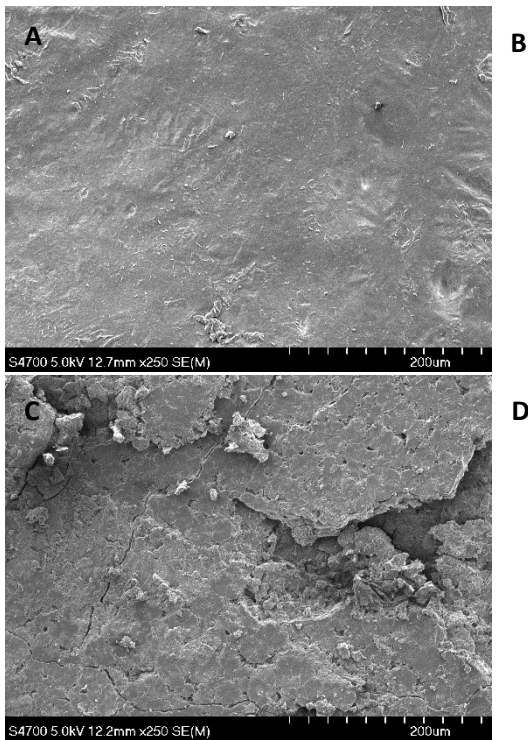

**Figure S2** - Scanning electron microscopy of leftover PET samples from hot compressed H<sub>2</sub>O (*i.e.* N<sub>2</sub>-H<sub>2</sub>O) reaction at 165 °C (non-isothermal conditions) (A), hot compressed H<sub>2</sub>O (*i.e.* N<sub>2</sub>-H<sub>2</sub>O) at 180 °C for 10 min (B), subcritical CO<sub>2</sub>-H<sub>2</sub>O at 165 °C (non-isothermal conditions) with 208 psi of initial CO<sub>2</sub> pressure (C), and subcritical CO<sub>2</sub>-H<sub>2</sub>O at 180 °C for 10 min with 208 psi of initial CO<sub>2</sub> pressure (D).

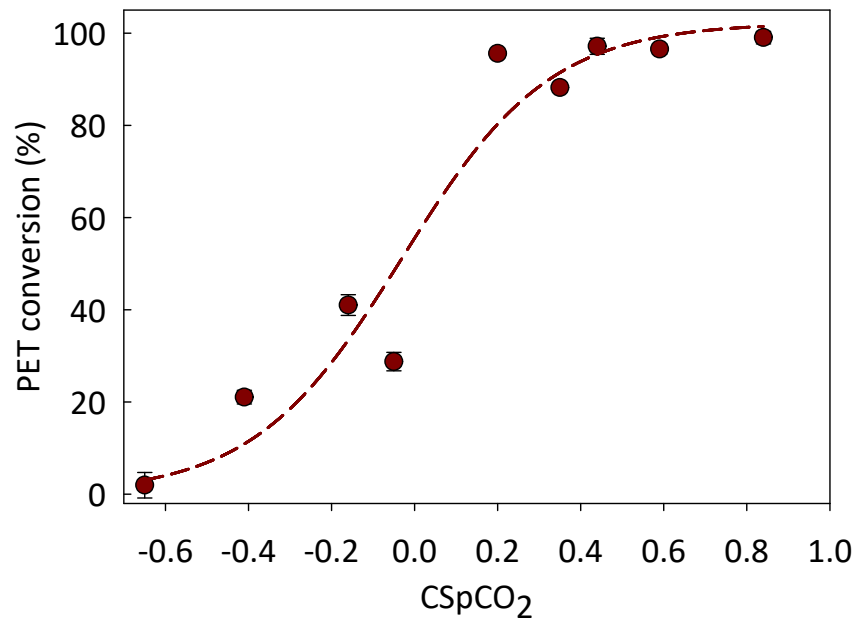

**Figure S3** – PET conversion (mass conversion into DMSO-soluble products) as a function of combined severity factor ( $C_{SpCO_2}$ ) follows a sigmoidal trend ( $R^2=0.935$ ). PET to H<sub>2</sub>O ratio 1:8 w/w (2.5 g PET: 20 g of H<sub>2</sub>O) and 208 psi of initial CO<sub>2</sub> pressure at varying temperatures (180, 190 and 200 °C), and residence times (10, 40 and 100 min).

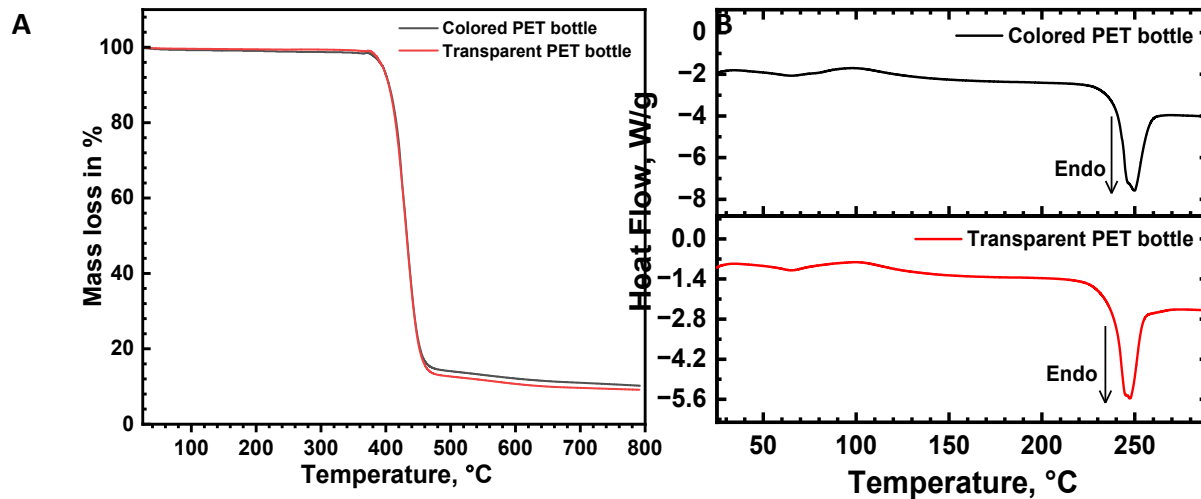

**Figure S4** – Results from simultaneous thermogravimetric analysis (A) and differential scanning calorimetry (B) for both colored Canada Dry and transparent Pure Life® waste PET bottles.

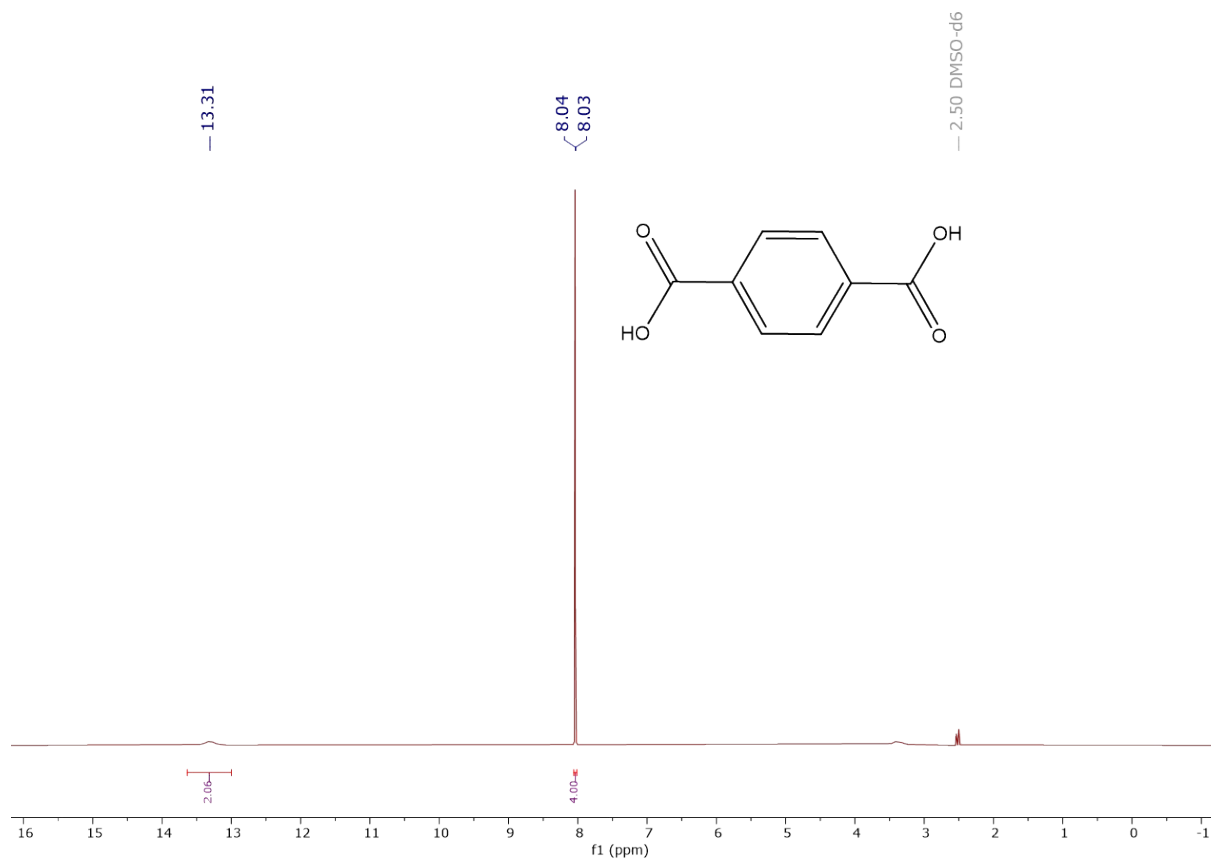

**Figure S5** - <sup>1</sup>H NMR spectrum of TPA recovered from standard PET (free of pigments and other additives present in waste PET bottles) processed with subcritical CO<sub>2</sub>-H<sub>2</sub>O. <sup>1</sup>H NMR (400 MHz, DMSO) δ 13.31 (s, 2H), 8.04 (s, 4H).

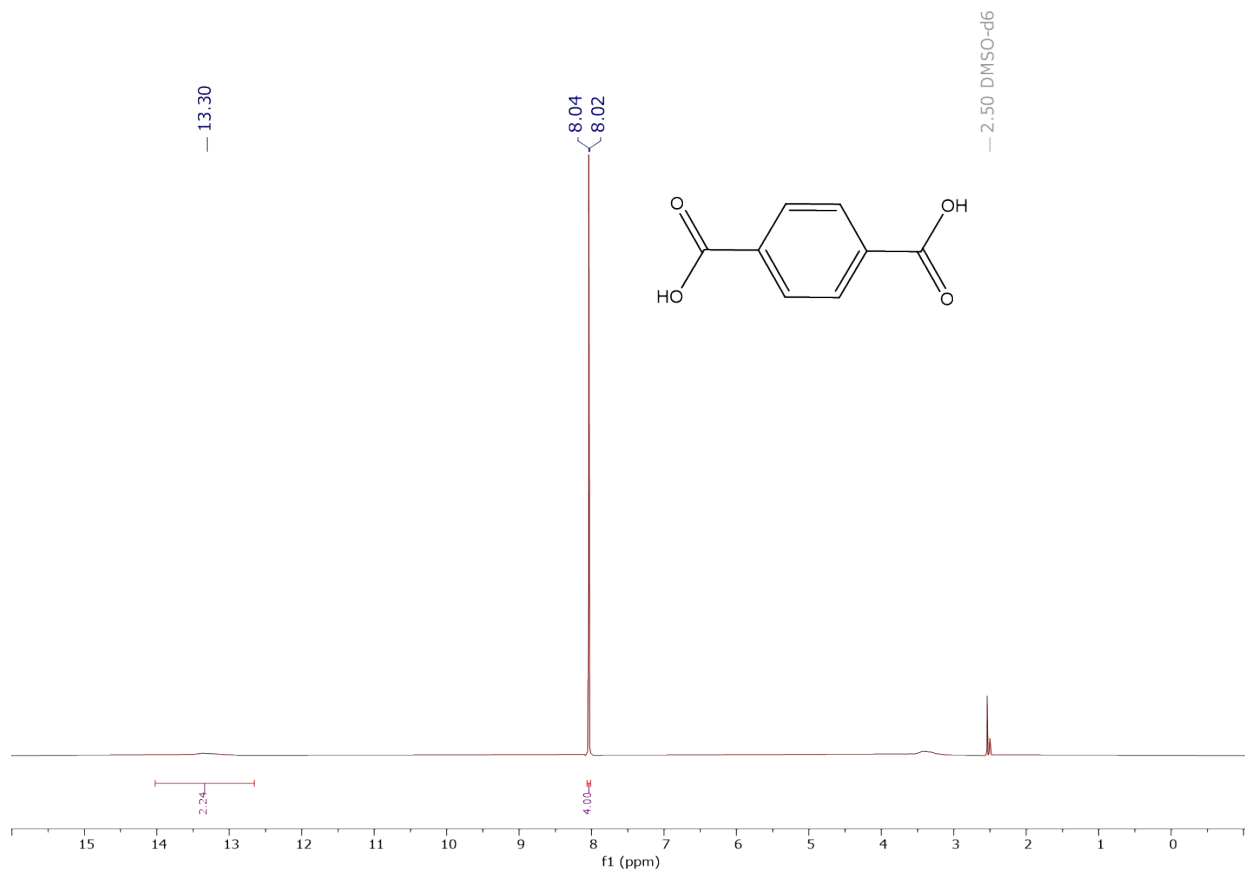

**Figure S6** -  $^1\text{H}$  NMR spectrum of TPA recovered from colored PET bottle processed with subcritical  $\text{CO}_2$ - $\text{H}_2\text{O}$ .  $^1\text{H}$  NMR (400 MHz,  $\text{DMSO}$ )  $\delta$  13.31 (s, 2H), 8.04 (s, 4H).

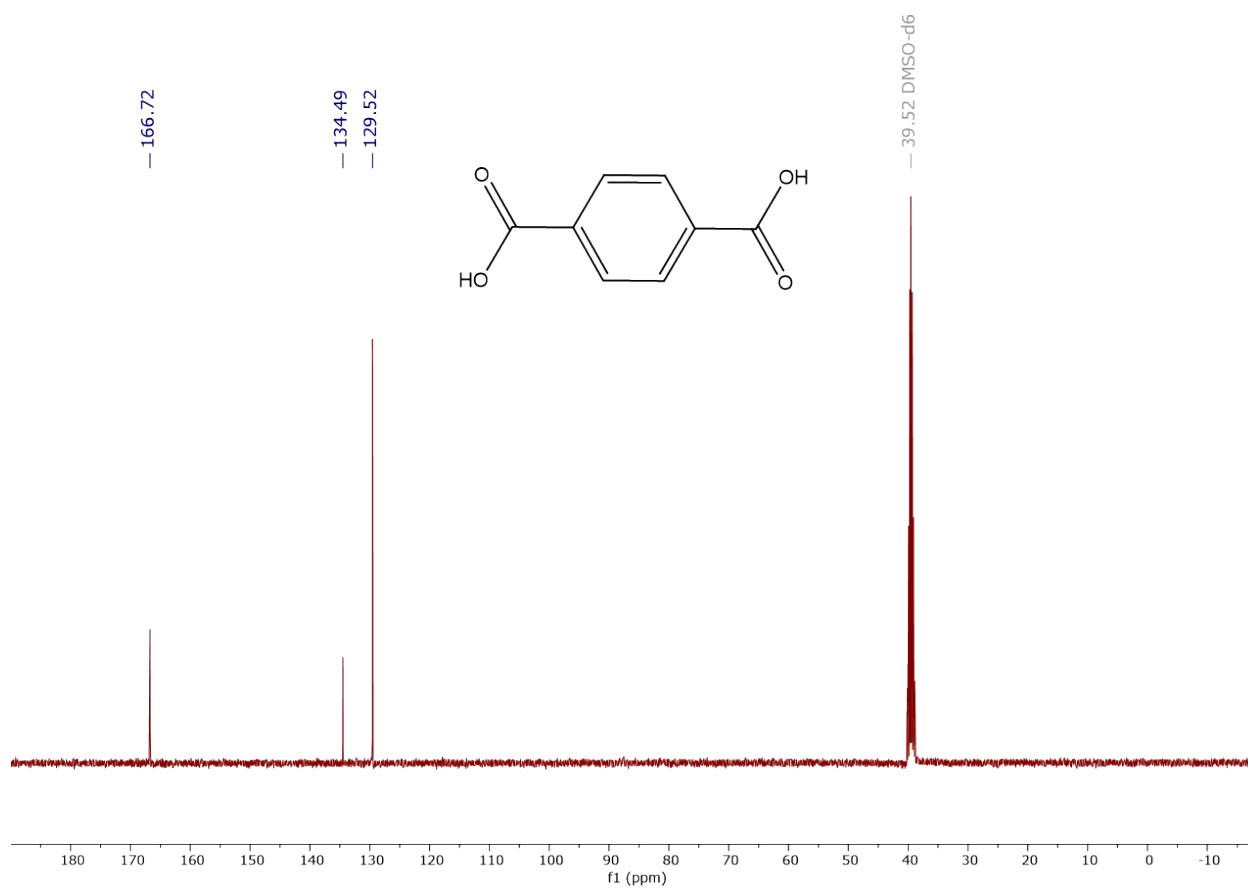

**Figure S7.**  $^{13}\text{C}$  NMR spectrum TPA recovered from standard PET (free of pigments and other additives present in waste PET bottles) processed with subcritical  $\text{CO}_2\text{-H}_2\text{O}$ .  $^{13}\text{C}$  NMR (101 MHz, DMSO)  $\delta$  166.72, 134.49, 129.52.

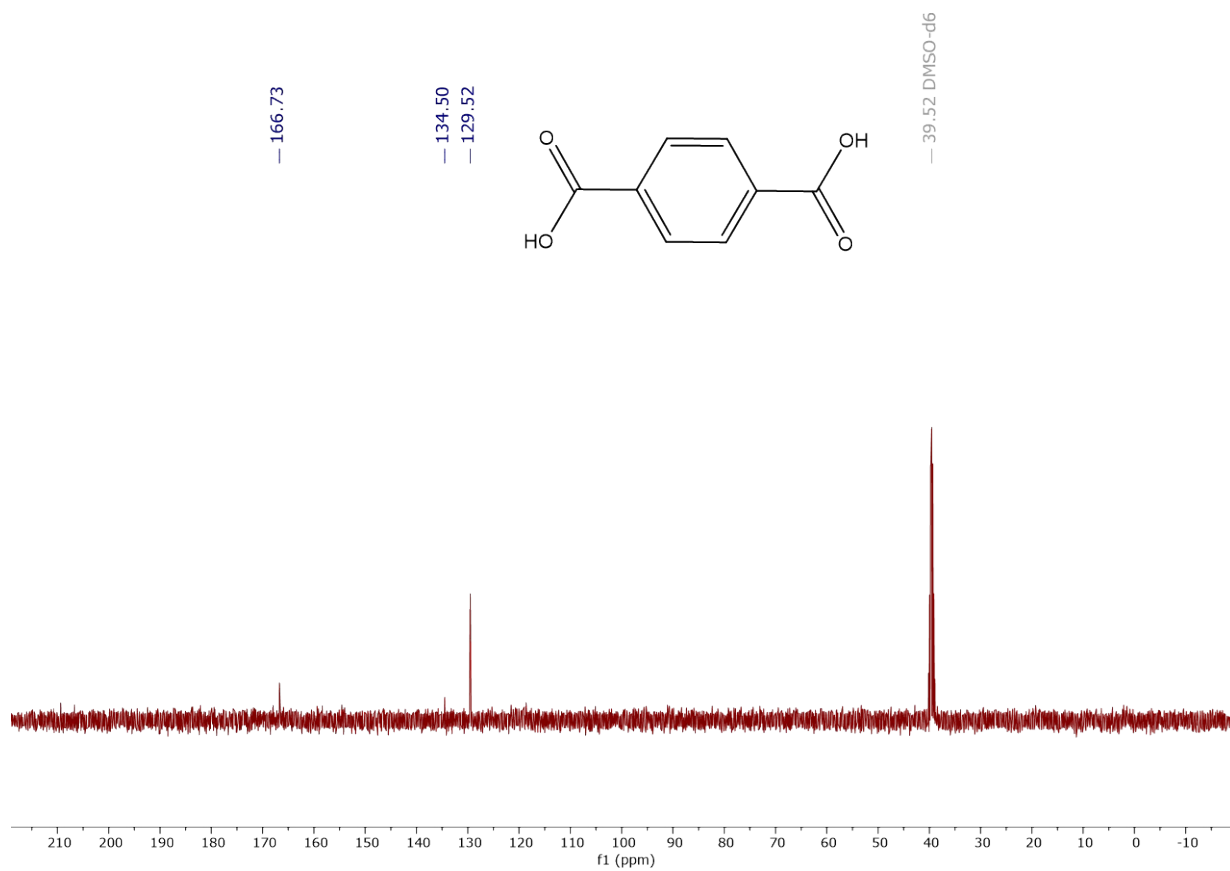

**Figure S8.** <sup>13</sup>C NMR spectrum of TPA recovered from colored PET bottle processed with subcritical CO<sub>2</sub>-H<sub>2</sub>O. <sup>13</sup>C NMR (101 MHz, DMSO) δ 166.73, 134.50, 129.52.

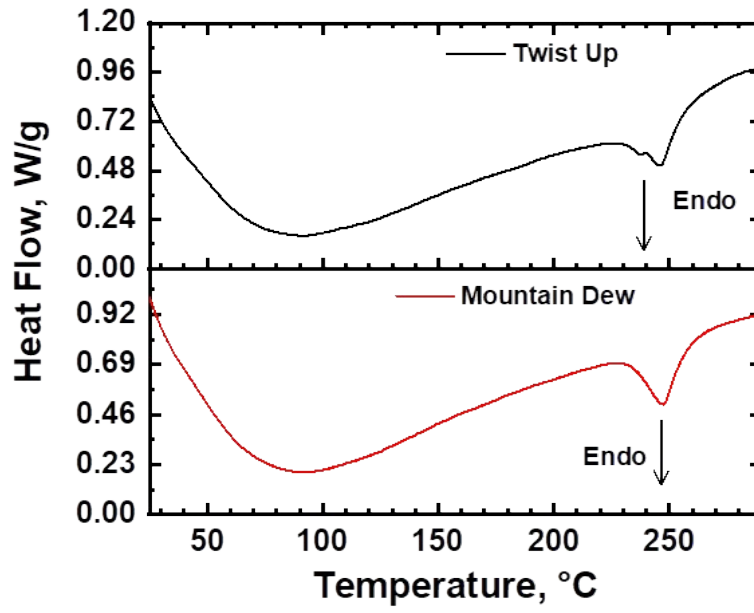

**Figure S9** – Differential scanning calorimetry for both colored Twist Up and transparent Mountain Dew waste PET bottles.



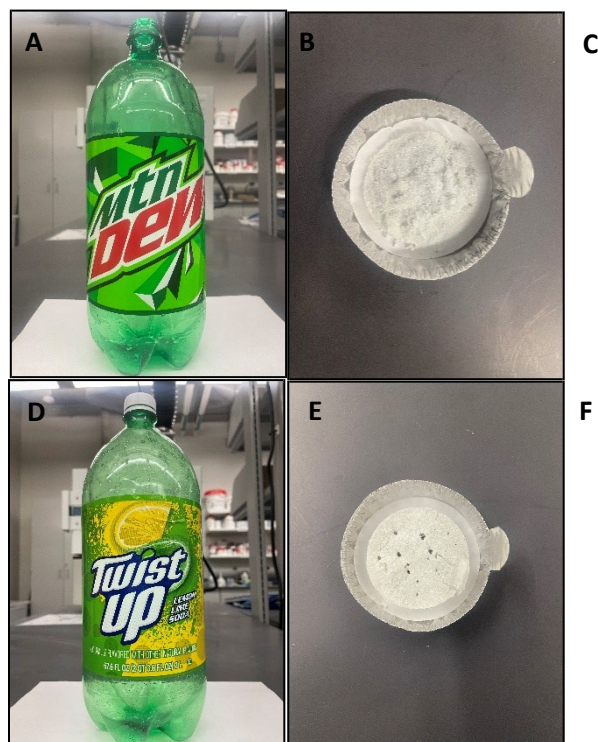

**Figure S10** – Reaction with subcritical CO<sub>2</sub>-H<sub>2</sub>O (2.5 g PET: 20 g of H<sub>2</sub>O) at 200 °C for 100 min with 208 psi of initial CO<sub>2</sub> pressure with post-consumer waste bottles, Mountain Dew bottle (A), Mountain Dew post reaction solids (B), Mountain Dew post reaction filtrate (C), and Twist Up bottle (D), Twist up post reaction solids (E), Twist Up post reaction filtrate (F).
